# Supplementary material for: CD44 Targeting Mediated by Polymeric Nanoparticles and Combination of Chlorine TPCS2a-PDT and Docetaxel-Chemotherapy for Efficient Killing of Breast Differentiated and Stem Cancer Cells In Vitro
Source: PubMed Central journal article supplement (PMC7072409; doi:10.3390/cancers12020278), 2020-01-23
Supplement: cancers-12-00278-s001.pdf [file cancers-12-00278-s001.pdf]

# CD44 Targeting Mediated by Polymeric Nanoparticles and Combination of Chlorine TPCS<sub>2a</sub>-PDT and Docetaxel-Chemotherapy for Efficient Killing of Breast Differentiated and Stem Cancer Cells In Vitro

Elisa Gaio, Claudia Conte, Diletta Esposito, Elena Reddi, Fabiana Quaglia and Francesca Moret

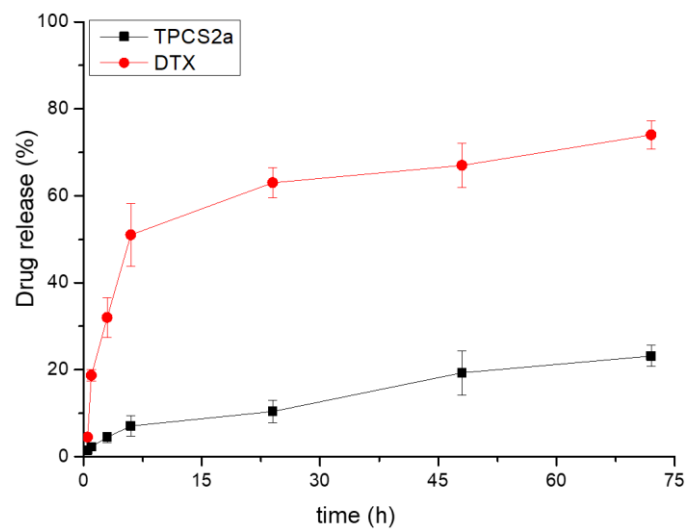

**Figure S1.** Release of TPCS<sub>2a</sub> and DTX from HA@DTX/TPCS<sub>2a</sub>-NPs in DMEM with 10% serum at 37 °C. Data are expressed as mean percentage  $\pm$  SD of three independent experiments.

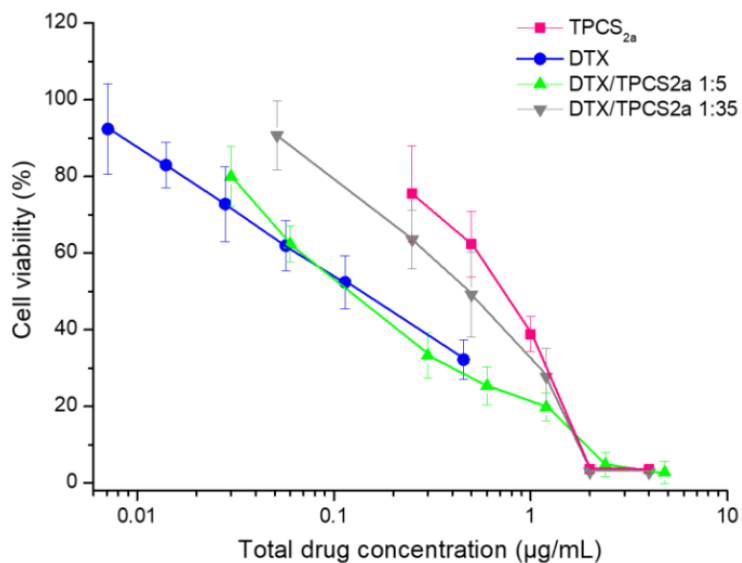

**Figure S2.** Cytotoxicity of free drugs delivered in the respective solvents in differentiated MCF-7 cells cultured as monolayers. Dose-response curves of cells incubated for 24 h with single drugs or their combination delivered in the free form, irradiated with 1 J/cm<sup>2</sup> of red light (600–800 nm) when PDT was part of the treatment. After additional 24 h in drug-free medium, cell viability was measured with the MTS assay. Total drug concentration is referred to DTX + TPCS2a concentration. Data are expressed as mean percentage ± SD of at least three independent experiments, carried out in triplicate.

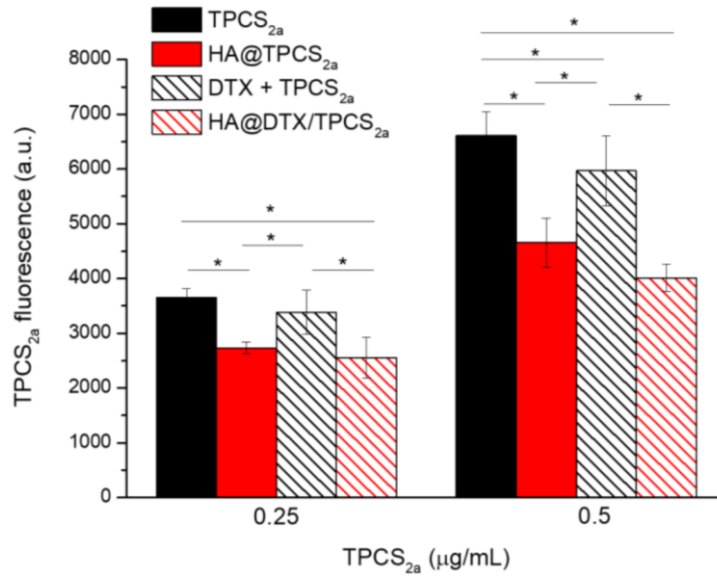

**Figure S3.** Intracellular uptake of TPCS2a measured in MCF-7 cell monolayers incubated with the photosensitizer delivered in the standard solvent or in HA-NPs, alone or in combination with DTX. The uptake was measured by flow cytometry after 24 h of cell incubation with the drugs. Data are expressed as mean percentage ± SD of at least two independent experiments, carried out in triplicate; \*  $p < 0.05$  (One-Way ANOVA, Bonferroni's correction).

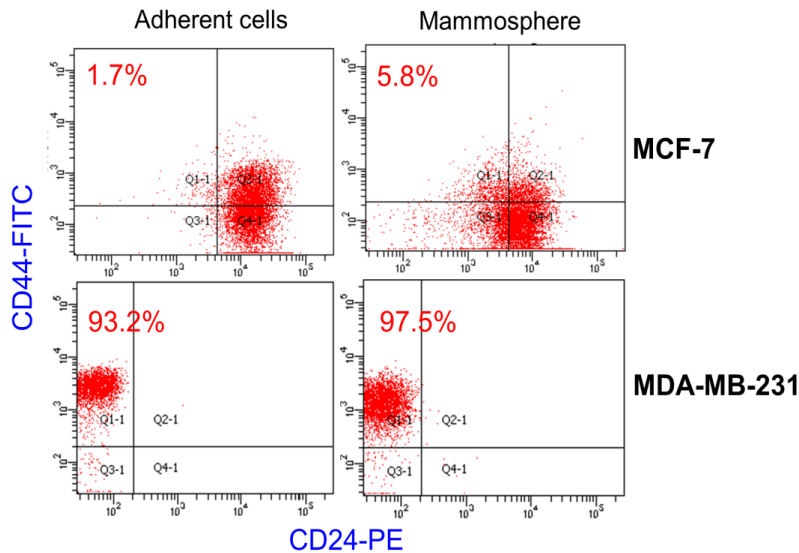

**Figure S4.** FACS representative plots of receptor profile (CD44/CD24) expression measured in MCF-7 and MDA-MB-231 cultured in adherent conditions or as mammospheres. Cells having a CD44high/CD24low profile, namely cancer stem-like cells, are indicated in Q1-1 with their percentages with respect to the total population indicated by the numbers in red.

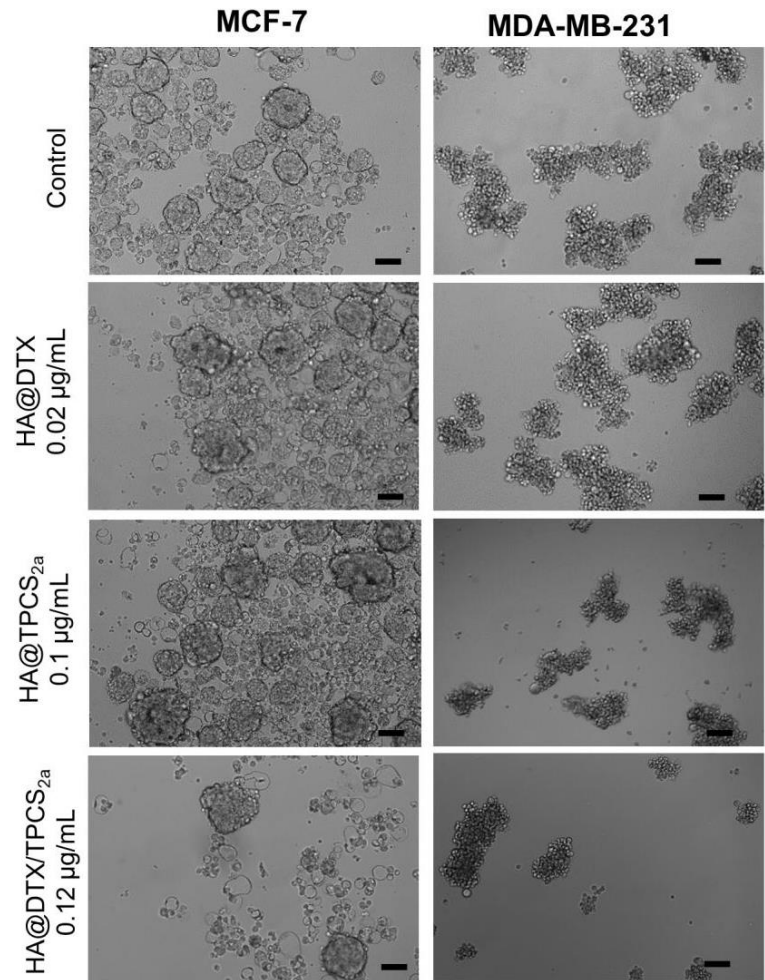

**Figure S5.** Representative bright field images of MCF-7 and MDA-MB-231 second-generation mammospheres derived from first generation mammospheres treated with HA-NPs. The images were acquired 7 or 4 days after the re-seed for MCF-7 and MDA-MB-231 cells, respectively. Scale bars: 100 µm.

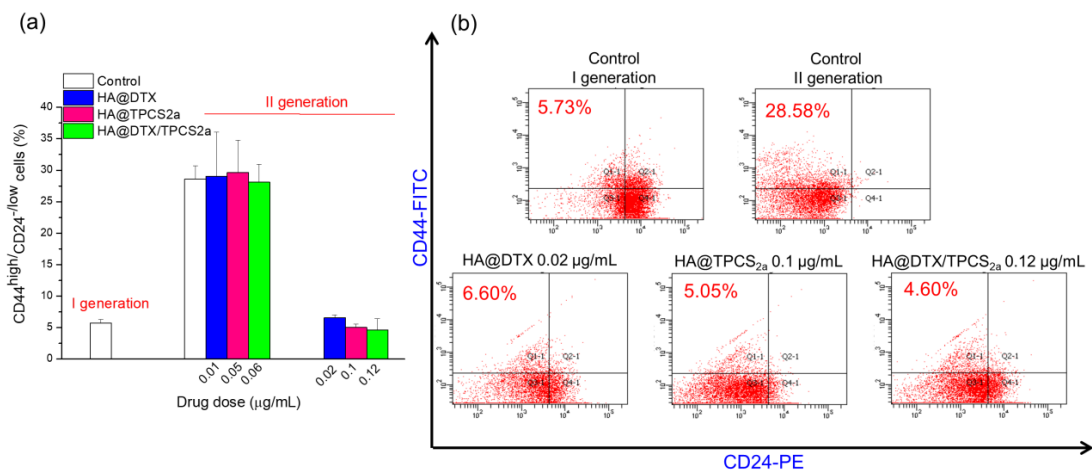

**Figure S6.** CD44/CD24 receptor profiles in MCF-7 mammospheres. (a) Proportion of CD44<sup>high</sup>/CD24<sup>low</sup> cells and (b) representative flow cytometry plots of receptor profile expression measured before (I generation) and after treatment (II generation) with HA@DTX-NPs, HA@TPCS<sub>2a</sub>-NPs and HA@DTX/TPCS<sub>2a</sub>-NPs. Mammospheres of the I generation were incubated for 24 h with NPs, irradiated with 1 J/cm<sup>2</sup>, and re-seeded in non-adherent condition to allow formation of II generation spheres. Before cytometer analysis, cells were stained with a combination of monoclonal antibodies against human CD44 (FITC-conjugated) and CD24 (PE-conjugated). In Q1-1 of the FACS

plots fall those cells having CD44<sup>high</sup>/CD24<sup>low</sup> cells receptor expression, namely cancer stem cells. Data are expressed as mean  $\pm$  S.D. of at least two independent experiments, carried out in triplicate.

**Table S1.** IC<sub>50</sub> or Dm value calculated by the Compusyn software in MCF-7 cells exposed to the different DTX and/or TPCS<sub>2a</sub> formulations. Values indicated drug dose expressed in  $\mu\text{g/mL}$ .

| <b>Drug Formulation</b>                | <b>Total</b> | <b>TPCS<sub>2a</sub></b> | <b>DTX</b> |
|----------------------------------------|--------------|--------------------------|------------|
| <i>TPCS<sub>2a</sub></i>               |              | 0.553                    |            |
| <i>DTX</i>                             |              |                          | 0.134      |
| <i>HA@TPCS<sub>2a</sub></i>            |              | 1.108                    |            |
| <i>HA@DTX</i>                          |              |                          | 0.144      |
| <i>DTX + TPCS<sub>2a</sub> (1:35)</i>  | 0.340        | 0.330                    | 0.009      |
| <i>DTX + TPCS<sub>2a</sub> (1:5)</i>   | 0.137        | 0.114                    | 0.023      |
| <i>HA@DTX/TPCS<sub>2a</sub> (1:35)</i> | 1.221        | 1.187                    | 0.034      |
| <i>HA@DTX/TPCS<sub>2a</sub> (1:5)</i>  | 0.272        | 0.226                    | 0.045      |

**Table S2.** IC<sub>50</sub> or Dm value calculated by the Compusyn software in MDA-MB-231 cells exposed to the different DTX and/or TPCS<sub>2a</sub> formulations. Values indicated drug dose expressed in  $\mu\text{g/mL}$ . These values have been already reported in our previous work ([16] of the main text).

| <b>Drug Formulation</b>                | <b>Total</b> | <b>TPCS<sub>2a</sub></b> | <b>DTX</b> |
|----------------------------------------|--------------|--------------------------|------------|
| <i>TPCS<sub>2a</sub></i>               |              | 0.332                    |            |
| <i>DTX</i>                             |              |                          | 0.016      |
| <i>HA@TPCS<sub>2a</sub></i>            |              | 0.455                    |            |
| <i>HA@DTX</i>                          |              |                          | 0.067      |
| <i>DTX + TPCS<sub>2a</sub> (1:35)</i>  | 0.200        | 0.195                    | 0.005      |
| <i>HA@DTX/TPCS<sub>2a</sub> (1:35)</i> | 0.055        | 0.054                    | 0.001      |
